# Supplementary material for: Maresin-1 and Resolvin E1 Promote Regenerative Properties of Periodontal Ligament Stem Cells Under Inflammatory Conditions
Source: PubMed Central journal article supplement (PMC7546375; doi:10.3389/fimmu.2020.585530), 2020-09-25

**A**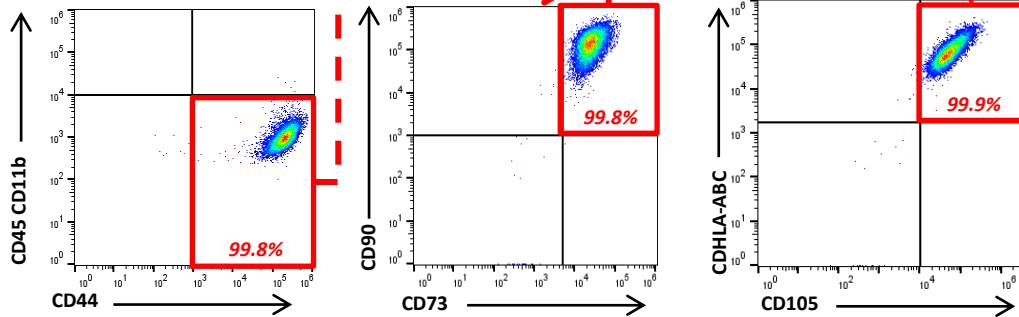**B**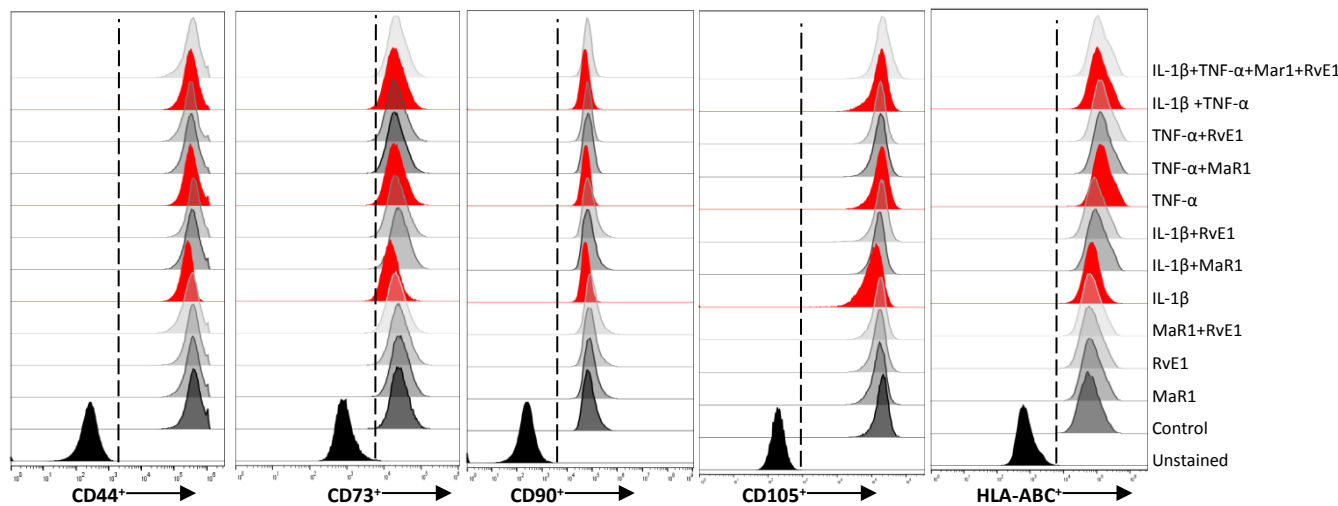**C**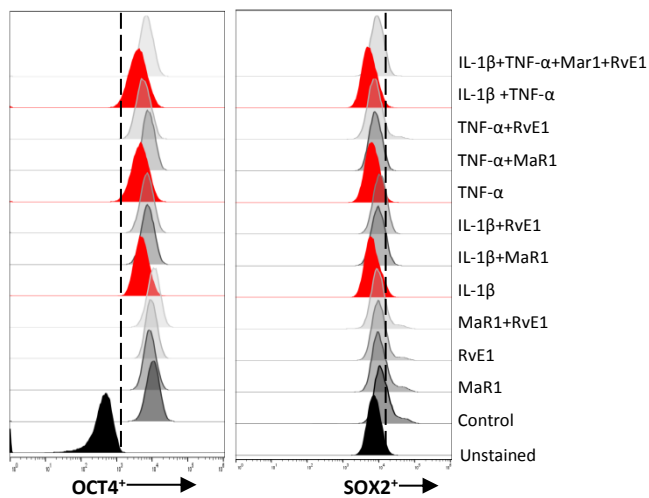**D**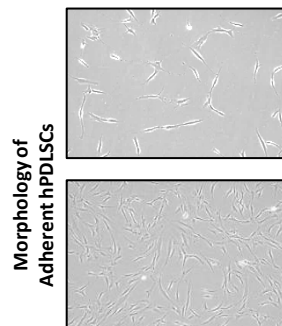

Supplement: Image_1.pdf [file Image_1.pdf]
